# Supplementary material for: The Impact of a Cycled Lighting Intervention on Nursing Home Residents: A Pilot Study
Source: PubMed Central journal article supplement — Gerontol Geriatr Med. 2019 Dec 24;5:2333721419897453. doi: 10.1177/2333721419897453 (PMC6931144; doi:10.1177/2333721419897453), 2019-12-24
Supplement: Supplementary_data.pdf [file Supplementary_data.pdf]

**Table 1 Participant Characteristics**

| Participants exposed to lighting intervention     |        |                |             |             |                                                                                            |
|---------------------------------------------------|--------|----------------|-------------|-------------|--------------------------------------------------------------------------------------------|
| ID                                                | Gender | Age<br>(Years) | Height (cm) | Weight (kg) | Medical History                                                                            |
| 1                                                 | F      | 83.33          | 156         | 45.45       | IDDM, TIAs, CKD, HTN, OP, ADRD                                                             |
| 2                                                 | M      | 80.42          | 178         | 54.35       | Valvular Heart Disease, MR, IHD, AF, PPM, coeliac disease, vertigo, asthma, HTN, cataracts |
| 3                                                 | F      | 65.08          | 169         | 59.7        | ADRD, depression                                                                           |
| 4                                                 | F      | 82.83          | 148         | 59.85       | HTN, OA, CCF, Hiatus hernia, Oesophagitis                                                  |
| 5                                                 | M      | 76.50          | 180         | 92.4        | HTN, AF, COPD, Osteopenia, BPH                                                             |
| 6                                                 | F      | 88.75          | 152         | 63.3        | HTN, polymyalgia rheumatica, anxiety disorder, ADRD, OP                                    |
| Participants not-exposed to lighting intervention |        |                |             |             |                                                                                            |
| ID                                                | Gender | Age<br>(Years) | Height (cm) | Weight (kg) | Medical History                                                                            |
| 7                                                 | M      | 77.75          | 176         | 63.35       | CVA, ADRD, HTN, cerebral amyloid angiopathy                                                |
| 8                                                 | F      | 84.00          | 161         | 103.25      | HTN, OA, Angina, Mild LVF, depression, anxiety disorder                                    |
| 9                                                 | F      | 84.17          | 170         | 61.05       | OP, ADRD, Hysterectomy, HTN, cholecystectomy                                               |

**Abbreviations:** ADRD, Alzheimer’s Disease and Related Dementia; AF, atrial fibrillation; BPH, benign prostatic hyperplasia; CCF, congestive cardiac failure; CKD, chronic kidney disease; CVA, cerebral vascular attack; HTN, hypertension; IDDM, Insulin Dependent Diabetes Mellitus; IHD, ischaemic heart disease; MR, mitral regurgitation; OA, osteoarthritis; OP, osteoporosis; PPM permanent pacemaker; TIA, Transient Ischaemic Attack

**Table 2 Measures of sleep, activity and mood for each study participant at week 1 (W1) – baseline, week 6 (W6) - post intervention, and week 8 (W8) - follow-up.**

|                          | Study ID | AM Mood Score |     |     | PM Mood Score |     |     | Time In Bed (mins) |       |       | Total Sleep Time (mins) |       |       | Sleep Efficiency (%) |      |      | Total Steps/Week |       |       |
|--------------------------|----------|---------------|-----|-----|---------------|-----|-----|--------------------|-------|-------|-------------------------|-------|-------|----------------------|------|------|------------------|-------|-------|
|                          |          | W1            | W6  | W8  | W1            | W6  | W8  | W1                 | W6    | W8    | W1                      | W6    | W8    | W1                   | W6   | W8   | W1               | W6    | W8    |
| <b>Exposed Group</b>     | <b>1</b> | 6.6           | 5.3 | 5.2 | 6.6           | 5.4 | 5.2 | 508.2              | 505.6 | 399   | 461.7                   | 460.4 | 362.5 | 91.2                 | 91.7 | 92.6 | 945              | 2026  | 477   |
|                          | <b>2</b> | 5.9           | 7.4 | 6   | 6.9           | 7.6 | 6.4 | 438                | 460   | 467   | 414.7                   | 450   | 452   | 94.7                 | 97.7 | 96.8 | 3420             | 6054  | 4385  |
|                          | <b>3</b> | 7.3           | 6   | 6.1 | 7.6           | 6.1 | 6.3 | 410.7              | 503.6 | 372.2 | 383                     | 467.9 | 349   | 93.7                 | 93   | 94.5 | Not mobile       |       |       |
|                          | <b>4</b> | 6.6           | 6.6 | 6.6 | 7.6           | 6.7 | 6.7 | 607.1              | 607.1 | 630.7 | 552.4                   | 552.4 | 574.2 | 91.1                 | 91.1 | 91.7 | 2686             | 1232  | 1277  |
|                          | <b>5</b> | 3             |     | 4   | 3.5           |     | 4   | 1038               |       | 995.7 | 944.3                   |       | 931.7 | 92.2                 |      | 94.3 | Not mobile       |       |       |
|                          | <b>6</b> | 8.5           | 6.8 | 6.5 | 9             | 6.6 | 6.5 | 428                | 388   | 207.9 | 381                     | 331   | 182   | 90.1                 | 86.8 | 89.8 | 15904            | 9263  | 30141 |
| <b>Non-Exposed Group</b> | <b>7</b> | 5.7           | 5.1 | 5.1 | 6.4           | 5.1 | 5.1 | 237.7              | 171.8 | 223   | 232.1                   | 166.5 | 217.4 | 97.4                 | 97.8 | 97.8 | 2571             | 1201  | 2486  |
|                          | <b>8</b> | 3.4           | 6.3 | 6.3 | 8.6           | 6.4 | 6.4 | 594                | 594   | 910   | 554.7                   | 554.7 | 816.7 | 93.7                 | 93.7 | 89.8 | 2874             | 1954  | 1956  |
|                          | <b>9</b> | 8             | 7.2 | 7.2 | 5.8           | 7.3 | 7.3 | 436                | 526   | 360.6 | 372                     | 465   | 316.1 | 85.9                 | 87.9 | 88.5 | 33188            | 18495 | 45301 |

No data presented for participant 5 at W6 as participant was admitted to hospital.
